# Supplementary material for: Selective adsorption of bismuth telluride nanoplatelets through electrostatic attraction
Source: Royal Society of Chemistry journal article supplement (doi:10.1039/c4cp00690a), 2014-01-01

### Supplementary Information

**SI Figure.** SEM images show the  $\text{Bi}_2\text{Te}_3$  nanoplatelet adsorption density could be controlled by varying the adsorption duration. The samples were prepared with the same  $\mu\text{CP}$  conditions, and then immersed in the nanoplatelet dispersion under a mild vortex for **(a)** 2 minutes, **(b)** 10 minutes, and **(c)** 20 minutes, respectively. With 20 minute adsorption, the AMTMS printed houndstooths were fully covered by  $\text{Bi}_2\text{Te}_3$  nanoplatelets.

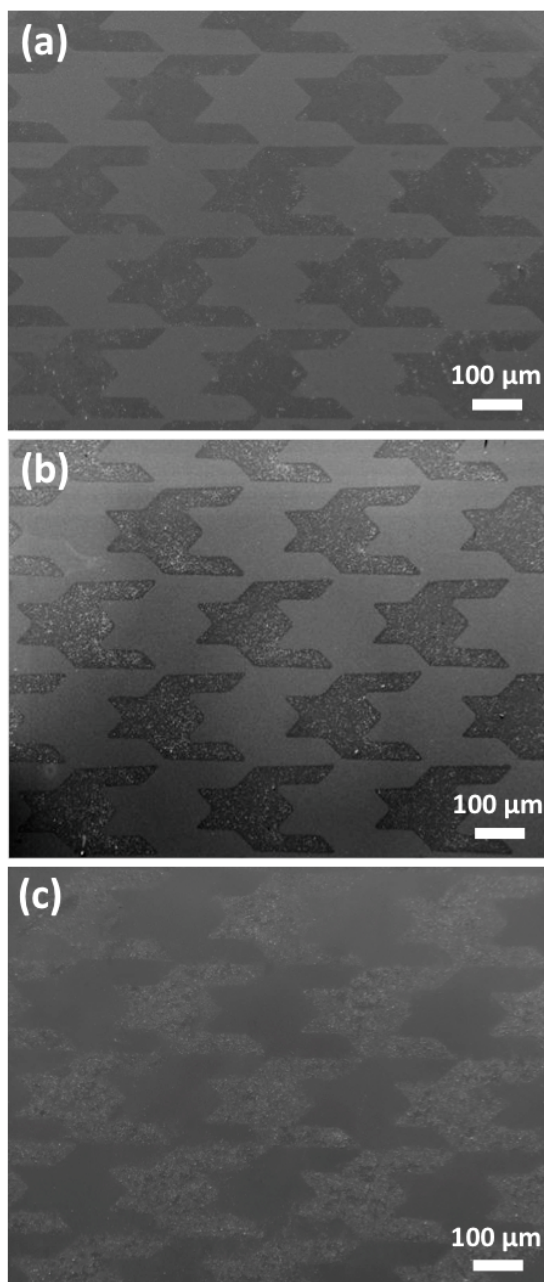

Supplement: c4cp00690a1.pdf [file c4cp00690a1.pdf]
